# Supplementary material for: Cavity Closure of 2-Hydroxypropyl-β-Cyclodextrin: Replica Exchange Molecular Dynamics Simulations
Source: PubMed Central journal article supplement (PMC6401915; doi:10.3390/polym11010145), 2019-01-16
Supplement: polymers-11-00145-s001.pdf [file polymers-11-00145-s001.pdf]

## Supplementary Materials

# Cavity Closure of 2-Hydroxypropyl- $\beta$ -Cyclodextrin: Replica Exchange Molecular Dynamics Simulations

Khanittha Kerdpol <sup>1</sup>, Jintawee Kicuntod <sup>2</sup>, Peter Wolschann <sup>2,3,4</sup>, Seiji Mori <sup>5</sup>,  
Chompoonut Rungnim <sup>6</sup>, Manaschai Kunaseth <sup>6</sup>, Hisashi Okumura <sup>7</sup>, Naweekungwan <sup>1,8,\*</sup>  
and Thanyada Rungrotmongkol <sup>2,9,10,\*</sup>

<sup>1</sup> Department of Chemistry, Faculty of Science, Chiang Mai University, Chiang Mai 50200, Thailand; khanittha.view@gmail.com

<sup>2</sup> Structural and Computational Biology Research Unit, Department of Biochemistry, Faculty of Science, Chulalongkorn University, Bangkok 10330, Thailand; jintawee.ki@gmail.com (J.K.); karl.peter.wolschann@univie.ac.at (P.W.)

<sup>3</sup> Department of Pharmaceutical Chemistry, University of Vienna, Vienna 1090, Austria

<sup>4</sup> Institute of Theoretical Chemistry, University of Vienna, Vienna 1090, Austria

<sup>5</sup> Institute of Quantum Beam Science, Graduate School of Science and Engineering, Ibaraki University, 2-1-1 Bunkyo, Mito, Ibaraki 310-8512, Japan; seiji.mori.compchem@vc.ibaraki.ac.jp

<sup>6</sup> National Nanotechnology Center (NANOTEC), National Science and Technology Development Agency (NSTDA), Pathum Thani 12120, Thailand; chompoonut@nanotec.or.th (C.R.); manaschai@nanotec.or.th (M.K.)

<sup>7</sup> Research Center for Computational Science, Institute for Molecular Science, Okazaki, Aichi 444-8585, Japan; hokumura@ims.ac.jp

<sup>8</sup> Center of Excellence in Materials Science and Technology, Chiang Mai University, Chiang Mai 50200, Thailand

<sup>9</sup> Ph.D. Program in Bioinformatics and Computational Biology, Faculty of Science, Chulalongkorn University, Bangkok 10330, Thailand

<sup>10</sup> Molecular Sensory Science Center, Faculty of Science, Chulalongkorn University, 254 Phayathai Road, Patumwan, Bangkok 10330, Thailand

\* Correspondence: naweekung@gmail.com (N.K.); thanyada.r@chula.ac.th (T.R.); Tel.: +66-5394-3341 (ext. 101) (N.K.); +66-2218-5426 (T.R.)

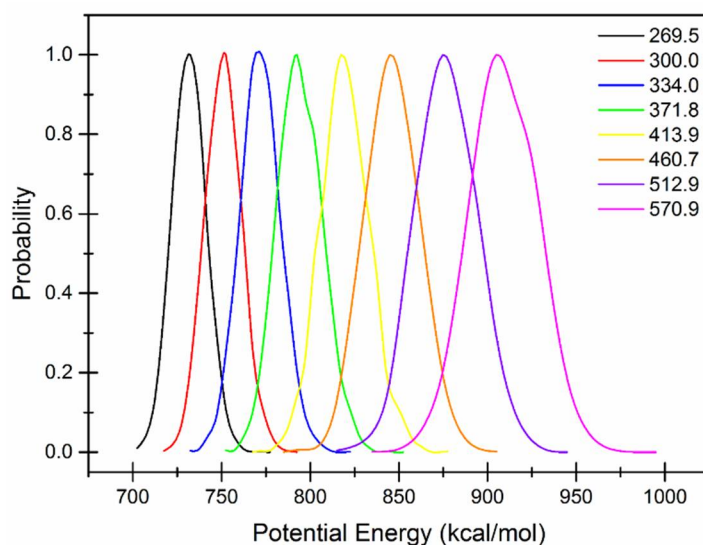

**Figure S1.** The overlapping between the potential energy distributions of each replica temperature ranging from 269.5 K to 570.9 K.

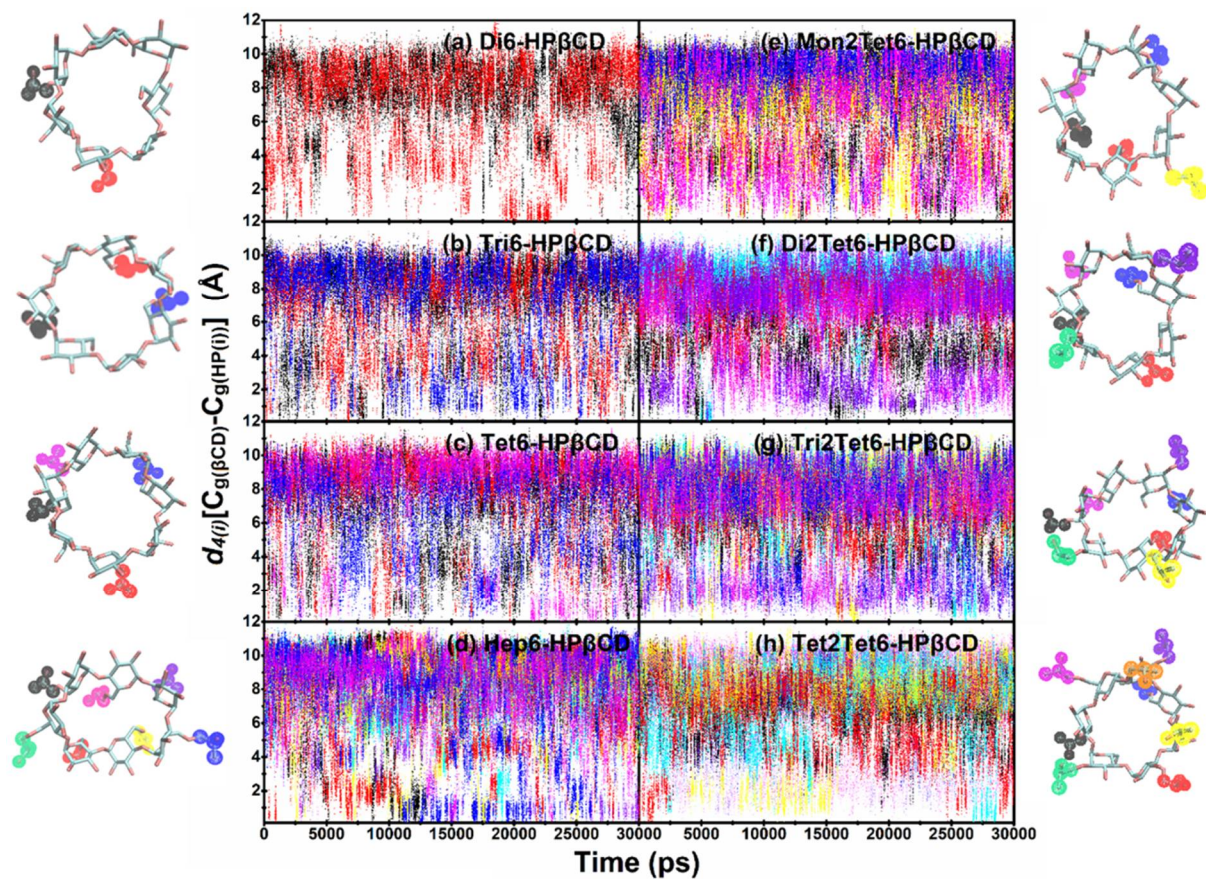

**Figure S2.** The distance of centers of mass between  $\beta$ CD ring and HP group,  $d_{4(i)}[C_{g(\beta CD)} - C_{g(HP(i))}]$  for (a) Di6-HP $\beta$ CD, (b) Tri6-HP $\beta$ CD, (c) Tet6-HP $\beta$ CD, (d) Hep6-HP $\beta$ CD, (e) Mon2Tet6-HP $\beta$ CD, (f) Di2Tet6-HP $\beta$ CD, (g) Tri2Tet6-HP $\beta$ CD, and (h) Tet2Tet6-HP $\beta$ CD at 300 K.

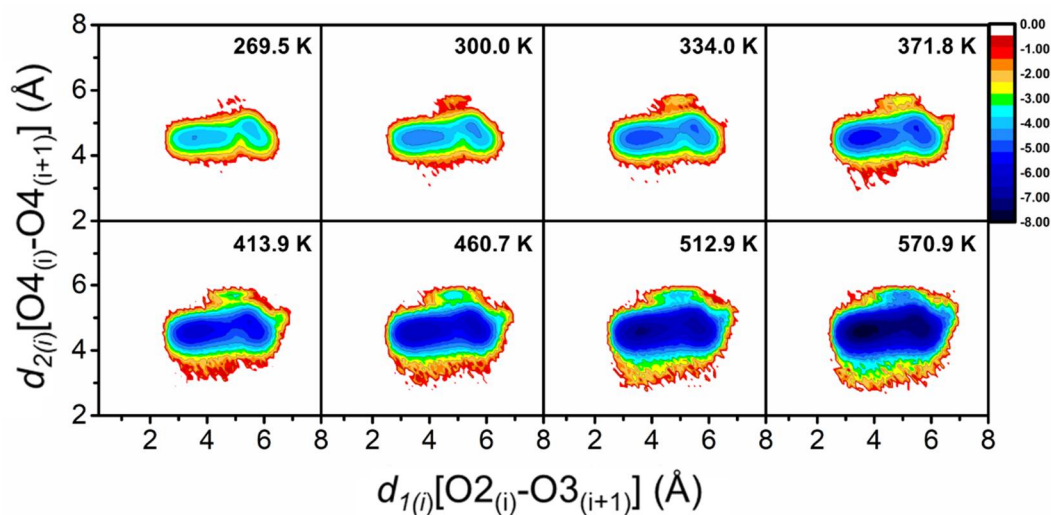

**Figure S3.** Contour graphs of the native  $\beta$ CD probability distribution of 25,000 snapshots with the glycam06 force field at various temperatures.

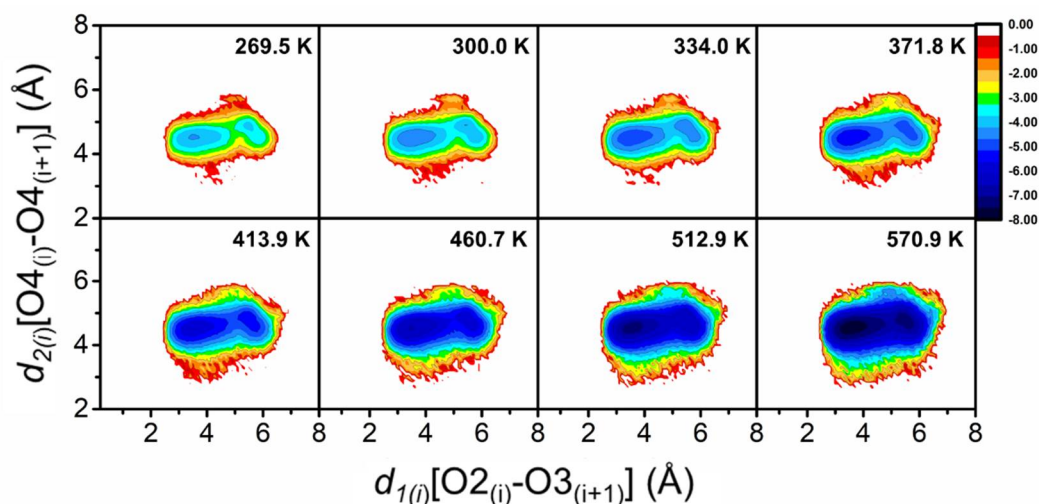

**Figure S4.** Contour graphs of the probability distribution of 25,000 snapshots of Mon6-HP $\beta$ CD with the glycam06 force field in the various temperatures.

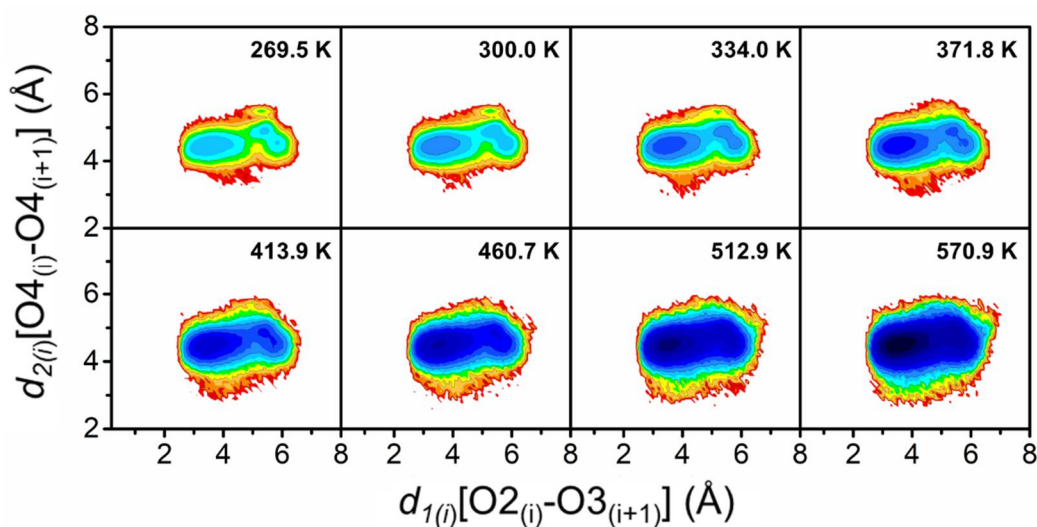

**Figure S5.** Contour graphs of the probability distribution of 25,000 snapshots of Di6-HP $\beta$ CD with the glycam06 force field in the various temperatures.

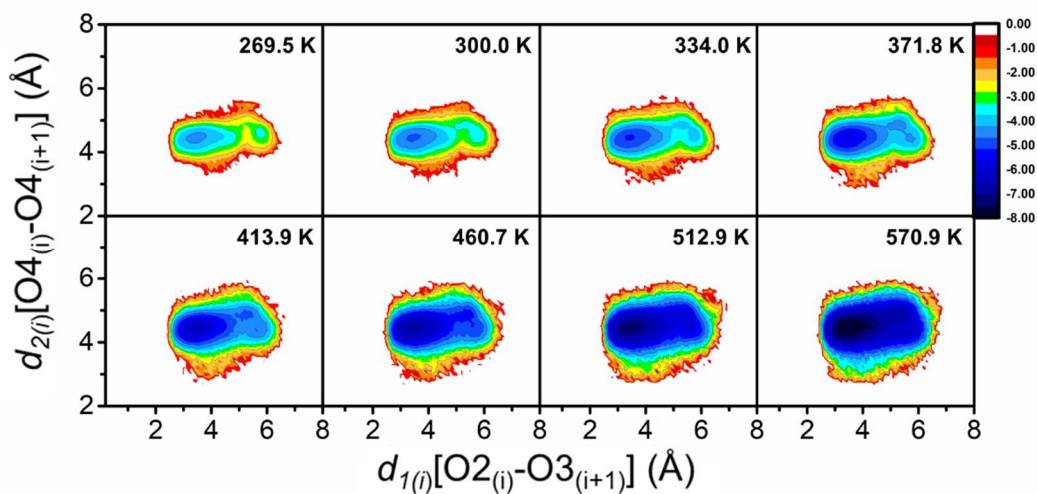

**Figure S6.** Contour graphs of the probability distribution of 25,000 snapshots of Tri6-HP $\beta$ CD with the glycam06 force field in the various temperatures.

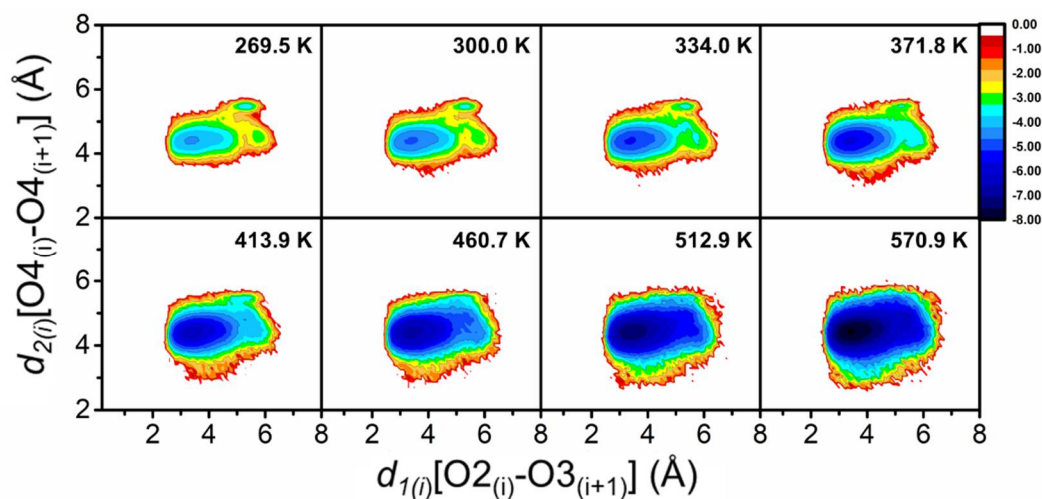

**Figure S7.** Contour graphs of the probability distribution of 25,000 snapshots of Tet6-HP $\beta$ CD with the glycam06 force field in the various temperatures.

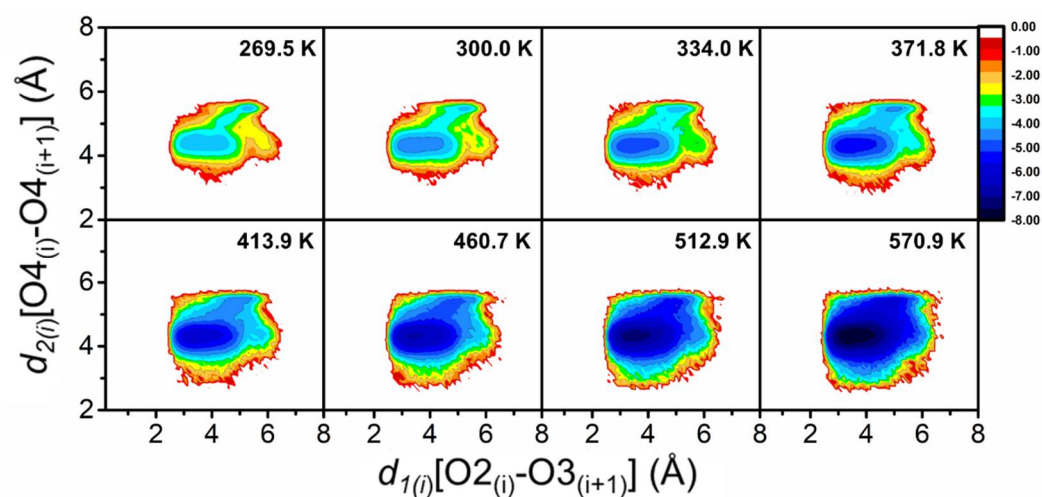

**Figure S8.** Contour graphs of the probability distribution of 25,000 snapshots of Hep6-HP $\beta$ CD with the glycam06 force field in the various temperatures.

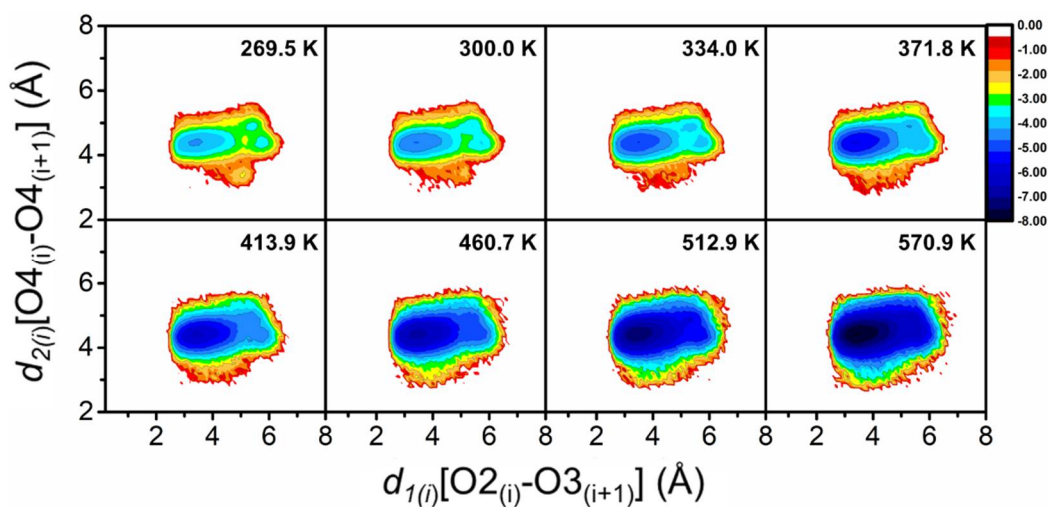

**Figure S9.** Contour graphs of the probability distribution of 25,000 snapshots of Mon2Tet6-HP $\beta$ CD with the glycam06 force field in the various temperatures.

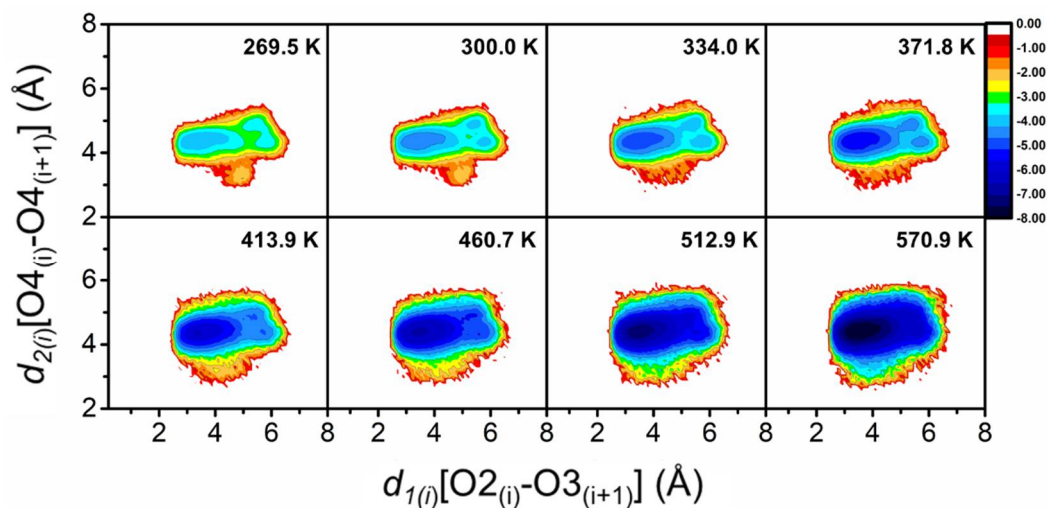

**Figure S10.** Contour graphs of the probability distribution of 25,000 snapshots of Di2Tet6-HP $\beta$ CD with the glycam06 force field in the various temperatures.

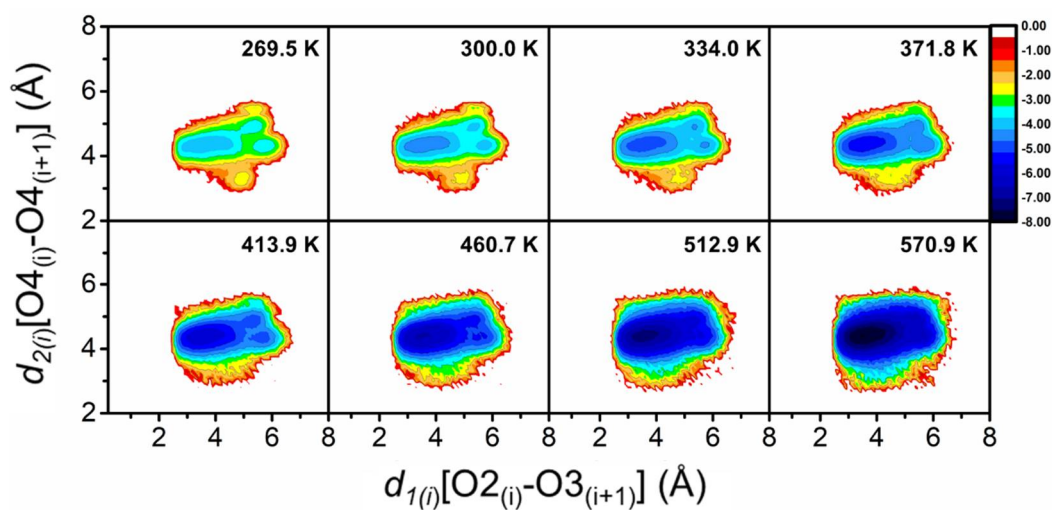

**Figure S11.** Contour graphs of the probability distribution of 25,000 snapshots of Tri2Tet6-HP $\beta$ CD with the glycam06 force field in the various temperatures.

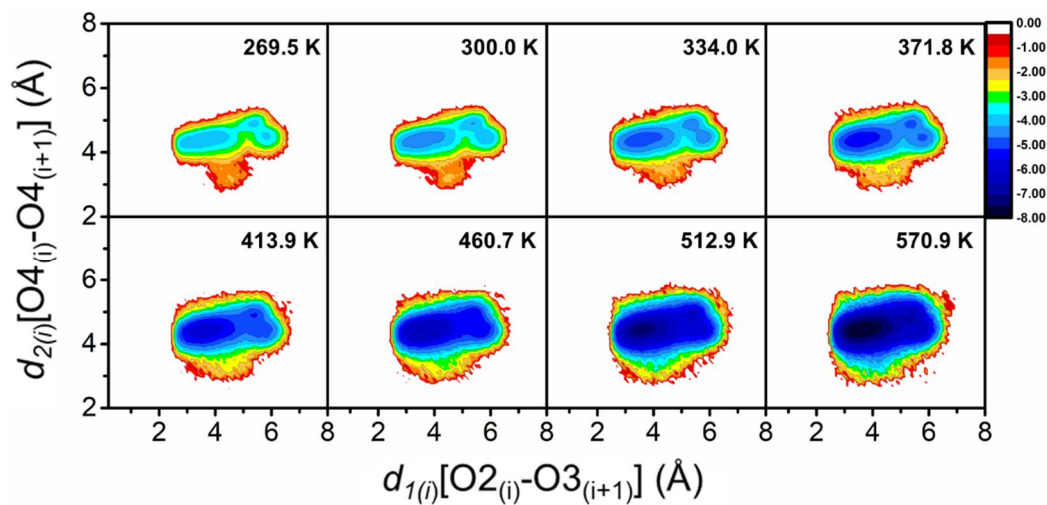

**Figure S12.** Contour graphs of the probability distribution of 25,000 snapshots of Tet2Tet6-HP $\beta$ CD with the glycam06 force field in the various temperatures.

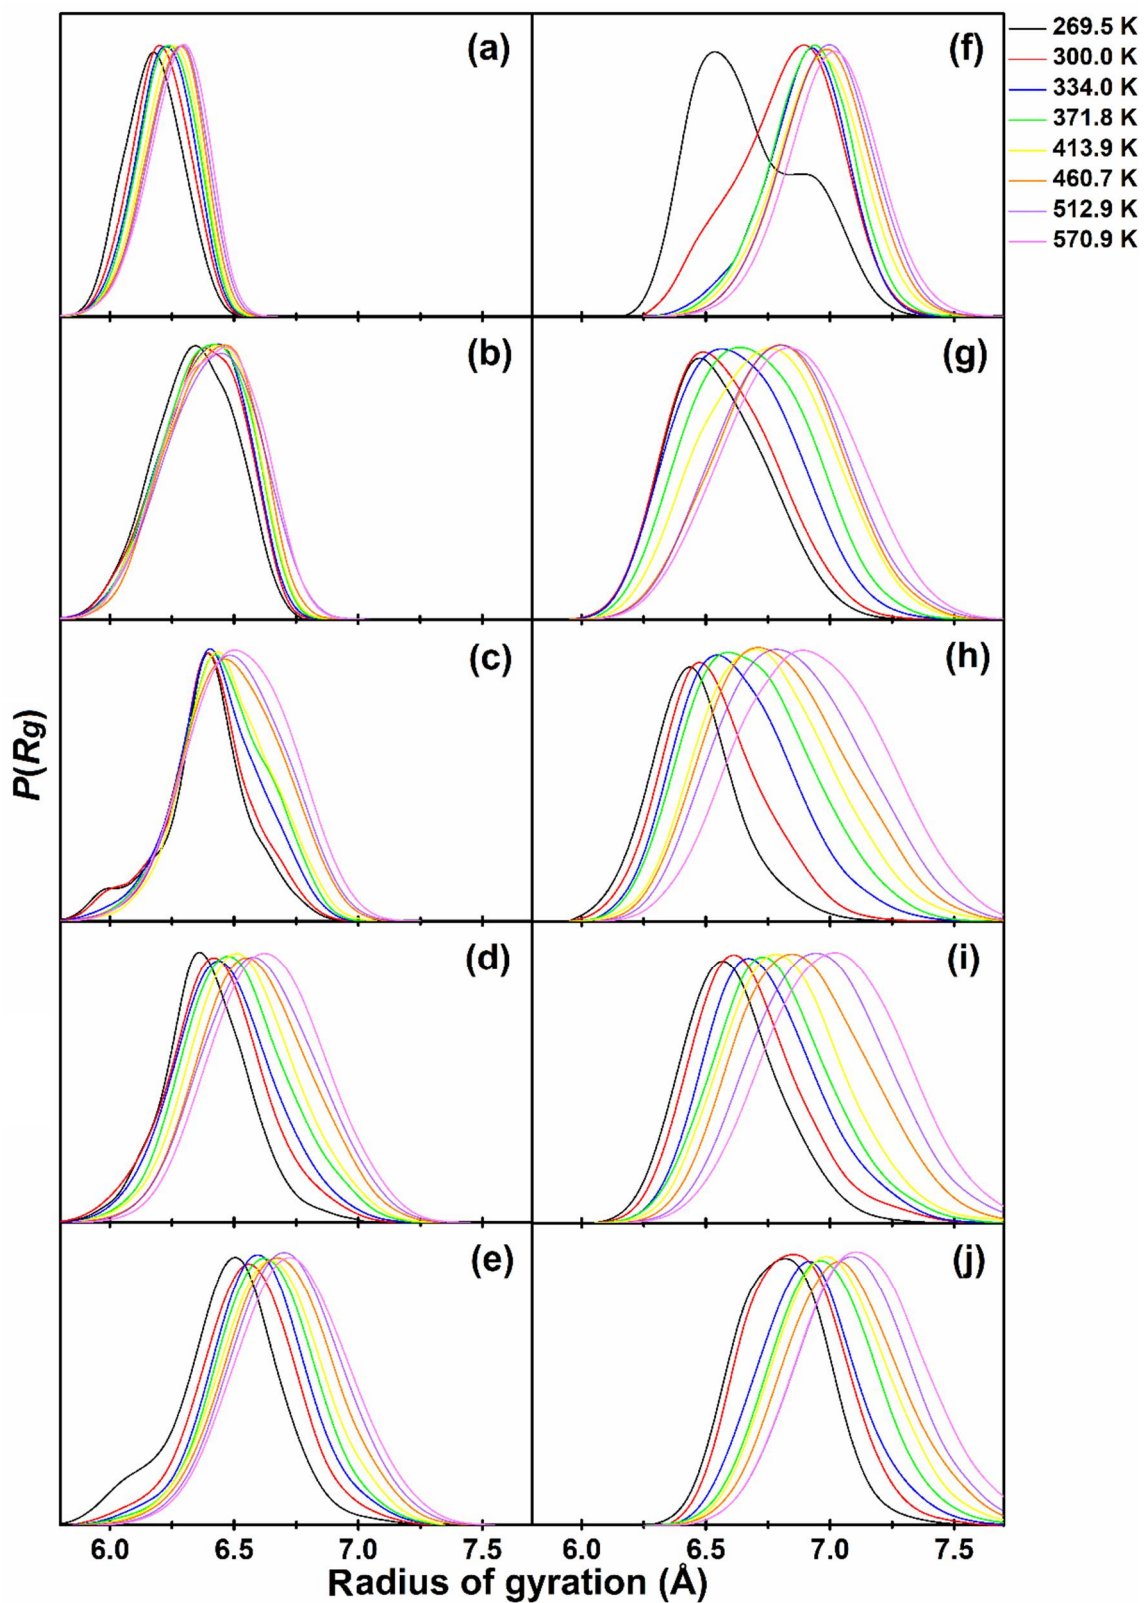

**Figure S13.** The radius of gyration in various temperatures for (a)  $\beta$ CD, (b) Mon6-HP $\beta$ CD, (c) Di6-HP $\beta$ CD, (d) Tri6-HP $\beta$ CD, (e) Tet6-HP $\beta$ CD, (f) Hep6-HPBCD, (g) Mon2Tet6-HPBCD, (h) Di2Tet6-HPBCD, (i) Tri2Tet6-HPBCD, and (j) Tet2Tet6-HPBCD.

**Table S1.** The probability of different numbers of flip glucose subunits in  $\beta$ CD and all HP $\beta$ CDs using flip angle parameter,  $\theta_{i}[C6_i-C2_{(i,1)}-C6_{(i,1)}]$  in the various temperatures (criteria: more value than 90 degree) compared with classical MD simulation in the parenthesis.

| The Percentage of Flip Angle (%)    |         |          |           |         |          |           |         |          |           |         |          |           |
|-------------------------------------|---------|----------|-----------|---------|----------|-----------|---------|----------|-----------|---------|----------|-----------|
| Temperature                         | 269.5 K |          |           | 300.0 K |          |           | 334.0 K |          |           | 371.8 K |          |           |
| Model                               | No flip | One flip | Two flips | No flip | One flip | Two flips | No flip | One flip | Two flips | No flip | One flip | Two flips |
| $\beta$ CD                          | 52      | 38       | 10        | 58 (28) | 35 (53)  | 7 (19)    | 61      | 33       | 6         | 59      | 34       | 7         |
| <b>Single-sided HP substitution</b> |         |          |           |         |          |           |         |          |           |         |          |           |
| Mon6-HP $\beta$ CD                  | 65      | 32       | 3         | 69      | 28       | 3         | 68      | 29       | 3         | 67      | 29       | 4         |
| Di6-HP $\beta$ CD                   | 75      | 23       | 2         | 74      | 23       | 3         | 76      | 22       | 2         | 76      | 22       | 2         |
| Tri6-HP $\beta$ CD                  | 70      | 29       | 1         | 75      | 24       | 1         | 78      | 21       | 1         | 77      | 21       | 2         |
| Tet6-HP $\beta$ CD                  | 66      | 33       | 1         | 78      | 21       | 1         | 81      | 18       | 1         | 81      | 18       | 1         |
| Hep6-HP $\beta$ CD                  | 43      | 54       | 3         | 73 (84) | 25 (15)  | 2 (1)     | 81      | 18       | 1         | 79      | 19       | 2         |
| <b>Double-sided HP substitution</b> |         |          |           |         |          |           |         |          |           |         |          |           |
| Mon2Tet6-HP $\beta$ CD              | 77      | 21       | 2         | 77      | 22       | 1         | 77      | 22       | 1         | 74      | 24       | 2         |
| Di2Tet6-HP $\beta$ CD               | 67      | 32       | 1         | 75      | 24       | 1         | 78      | 20       | 2         | 78      | 20       | 2         |
| Tri2Tet6-HP $\beta$ CD              | 67      | 31       | 2         | 70      | 28       | 2         | 71      | 26       | 3         | 68      | 28       | 2         |
| Tet2Tet6-HP $\beta$ CD              | 74      | 23       | 3         | 74      | 24       | 2         | 74      | 24       | 2         | 73      | 24       | 3         |
| Temperature                         | 413.9 K |          |           | 460.7 K |          |           | 512.9 K |          |           | 570.9 K |          |           |
| Model                               | No flip | One flip | Two flips | No flip | One flip | Two flips | No flip | One flip | Two flips | No flip | One flip | Two flips |
| $\beta$ CD                          | 63      | 30       | 7         | 63      | 30       | 7         | 62      | 31       | 7         | 61      | 32       | 7         |
| <b>Single-sided HP substitution</b> |         |          |           |         |          |           |         |          |           |         |          |           |
| Mon6-HP $\beta$ CD                  | 65      | 30       | 5         | 65      | 30       | 5         | 64      | 30       | 6         | 61      | 32       | 7         |
| Di6-HP $\beta$ CD                   | 73      | 24       | 3         | 71      | 26       | 3         | 66      | 29       | 5         | 65      | 29       | 6         |
| Tri6-HP $\beta$ CD                  | 76      | 21       | 3         | 73      | 24       | 3         | 68      | 28       | 4         | 64      | 30       | 6         |
| Tet6-HP $\beta$ CD                  | 78      | 20       | 2         | 76      | 21       | 3         | 73      | 24       | 3         | 67      | 28       | 5         |
| Hep6-HP $\beta$ CD                  | 77      | 21       | 2         | 73      | 23       | 4         | 69      | 26       | 5         | 64      | 30       | 6         |
| <b>Double-sided HP substitution</b> |         |          |           |         |          |           |         |          |           |         |          |           |
| Mon2Tet6-HP $\beta$ CD              | 74      | 24       | 2         | 73      | 24       | 3         | 70      | 26       | 4         | 65      | 29       | 6         |
| Di2Tet6-HP $\beta$ CD               | 76      | 22       | 2         | 72      | 25       | 3         | 69      | 27       | 4         | 66      | 29       | 5         |
| Tri2Tet6-HP $\beta$ CD              | 68      | 29       | 3         | 68      | 28       | 4         | 68      | 28       | 4         | 66      | 29       | 5         |
| Tet2Tet6-HP $\beta$ CD              | 72      | 25       | 3         | 70      | 27       | 3         | 67      | 29       | 4         | 65      | 30       | 5         |

**Table S2.** The probability of 25,000 snapshots with different numbers of HP occupied in CD cavity (criteria:  $d_{4(i)}[C_{g(\beta CD)} - C_{g(HP(i))}] < 3 \text{ \AA}$ ) for all HP $\beta$ CDs in the various temperatures.

| <b>The Probability of Different Numbers of <math>d_{4(i)}[C_{g(\beta CD)} - C_{g(HP(i))}] &lt; 3 \text{ \AA}</math> (%)</b> |                                                    |                        |              |              |              |              |              |              |              |
|-----------------------------------------------------------------------------------------------------------------------------|----------------------------------------------------|------------------------|--------------|--------------|--------------|--------------|--------------|--------------|--------------|
| <b>Model</b>                                                                                                                | <b><math>n(\text{HP}_{\text{inserted}})</math></b> | <b>Temperature (K)</b> |              |              |              |              |              |              |              |
|                                                                                                                             |                                                    | <b>269.5</b>           | <b>300.0</b> | <b>334.0</b> | <b>371.8</b> | <b>413.9</b> | <b>460.7</b> | <b>512.9</b> | <b>570.9</b> |
| <b>Single-sided HP substitution</b>                                                                                         |                                                    |                        |              |              |              |              |              |              |              |
| <b>Mon6-HP<math>\beta</math>CD</b>                                                                                          | <b>0</b>                                           | 96.45                  | 97.59        | 97.88        | 97.25        | 97.81        | 98.80        | 98.63        | 98.33        |
|                                                                                                                             | <b>1</b>                                           | 3.55                   | 2.41         | 2.12         | 2.75         | 2.19         | 1.20         | 1.37         | 1.67         |
| <b>Di6-HP<math>\beta</math>CD</b>                                                                                           | <b>0</b>                                           | 84.44                  | 86.80        | 91.21        | 93.00        | 94.30        | 94.69        | 95.39        | 96.01        |
|                                                                                                                             | <b>1</b>                                           | 15.56                  | 13.20        | 8.79         | 7.00         | 5.70         | 5.31         | 4.61         | 3.99         |
| <b>Tri6-HP<math>\beta</math>CD</b>                                                                                          | <b>0</b>                                           | 51.92                  | 62.69        | 71.25        | 77.77        | 84.25        | 88.56        | 90.54        | 94.16        |
|                                                                                                                             | <b>1</b>                                           | 48.06                  | 37.25        | 28.72        | 22.22        | 15.75        | 11.44        | 9.44         | 5.84         |
|                                                                                                                             | <b>2</b>                                           | 0.02                   | 0.06         | 0.03         | 0.01         | 0.00         | 0.00         | 0.02         | 0.00         |
| <b>Tet6-HP<math>\beta</math>CD</b>                                                                                          | <b>0</b>                                           | 46.44                  | 61.66        | 68.80        | 74.52        | 77.54        | 83.42        | 87.17        | 89.24        |
|                                                                                                                             | <b>1</b>                                           | 53.48                  | 38.30        | 31.13        | 25.46        | 22.42        | 16.58        | 12.82        | 10.76        |
|                                                                                                                             | <b>2</b>                                           | 0.08                   | 0.04         | 0.07         | 0.02         | 0.04         | 0.00         | 0.01         | 0.00         |
| <b>Hep6-HP<math>\beta</math>CD</b>                                                                                          | <b>0</b>                                           | 15.14                  | 42.41        | 61.04        | 65.90        | 74.98        | 79.94        | 83.04        | 85.76        |
|                                                                                                                             | <b>1</b>                                           | 84.59                  | 57.45        | 38.88        | 34.06        | 24.99        | 20.02        | 16.92        | 14.21        |
|                                                                                                                             | <b>2</b>                                           | 0.27                   | 0.14         | 0.08         | 0.04         | 0.03         | 0.04         | 0.04         | 0.03         |
| <b>Double-sided HP substitution</b>                                                                                         |                                                    |                        |              |              |              |              |              |              |              |
| <b>Mon2Tet6-HP<math>\beta</math>CD</b>                                                                                      | <b>0</b>                                           | 42.64                  | 44.28        | 51.70        | 58.09        | 67.69        | 72.06        | 76.31        | 79.21        |
|                                                                                                                             | <b>1</b>                                           | 57.04                  | 54.53        | 47.42        | 41.37        | 31.98        | 27.73        | 23.50        | 20.66        |
|                                                                                                                             | <b>2</b>                                           | 1.32                   | 1.19         | 0.88         | 0.54         | 0.33         | 0.21         | 0.19         | 0.13         |
| <b>Di2Tet6-HP<math>\beta</math>CD</b>                                                                                       | <b>0</b>                                           | 23.51                  | 33.40        | 45.25        | 51.01        | 56.64        | 60.77        | 65.14        | 71.96        |
|                                                                                                                             | <b>1</b>                                           | 75.37                  | 65.36        | 53.95        | 48.22        | 42.68        | 38.77        | 34.46        | 27.75        |
|                                                                                                                             | <b>2</b>                                           | 1.12                   | 1.24         | 0.80         | 0.77         | 0.68         | 0.46         | 0.40         | 0.29         |
| <b>Tri2Tet6-HP<math>\beta</math>CD</b>                                                                                      | <b>0</b>                                           | 21.11                  | 26.46        | 34.52        | 39.18        | 43.60        | 53.79        | 60.66        | 67.70        |
|                                                                                                                             | <b>1</b>                                           | 77.73                  | 72.24        | 64.44        | 59.93        | 55.42        | 45.59        | 38.83        | 31.99        |
|                                                                                                                             | <b>2</b>                                           | 1.16                   | 1.30         | 1.04         | 0.89         | 0.98         | 0.62         | 0.51         | 0.31         |
| <b>Tet2Tet6-HP<math>\beta</math>CD</b>                                                                                      | <b>0</b>                                           | 35.34                  | 38.58        | 40.27        | 47.16        | 48.88        | 51.23        | 53.28        | 60.79        |
|                                                                                                                             | <b>1</b>                                           | 63.94                  | 60.66        | 58.84        | 52.22        | 50.36        | 48.10        | 46.10        | 38.84        |
|                                                                                                                             | <b>2</b>                                           | 0.72                   | 0.76         | 0.89         | 0.62         | 0.76         | 0.67         | 0.62         | 0.37         |
